# Supplementary material for: Zanthoxylum bungeanum Waste-Derived High-Nitrogen Self-Doped Porous Carbons as Efficient Adsorbents for Methylene Blue
Source: MDPI journal article supplement (doi:10.3390/molecules29081809), 2024-04-16
Supplement: s1 [file s1]

# Supplementary Materials

## *Zanthoxylum bungeanum* Waste-Derived High-Nitrogen Self-Doped Porous Carbons as Efficient Adsorbents for Methylene Blue

Yuhong Zhao <sup>1,2</sup>, Qi Zhang <sup>1</sup>, Zhuhua Gong <sup>1</sup>, Wenlin Zhang <sup>1,\*</sup>, Yun Ren <sup>1</sup>, Qiang Li <sup>1</sup>, Hongjia Lu <sup>1</sup>, Qinhong Liao <sup>1</sup>, Zexiong Chen <sup>1</sup> and Jianmin Tang <sup>1</sup>

- <sup>1</sup> Chongqing Key Laboratory for Germplasm Innovation of Special Aromatic Spice Plants, Institute of Special Plants, College of Smart Agriculture, Chongqing University of Arts and Sciences, Chongqing 402160, China; zyh0101hyz@163.com (Y.Z.); 18183376283@163.com (Q.Z.); 15208482161@163.com (Z.G.); reny1989@sina.com (Y.R.); liqiangxj@163.com (Q.L.); aaluhongjia@163.com (H.L.); lqhwisdom@126.com (Q.H.L.); chenzexiong1979@163.com (Z.C.); tangjmjy@163.com (J.T.)
- <sup>2</sup> College of Biology and Food Engineering, Chongqing Three Gorges University, Chongqing 404199, China
- \* Correspondence: zhangwenlin@cqwu.edu.cn

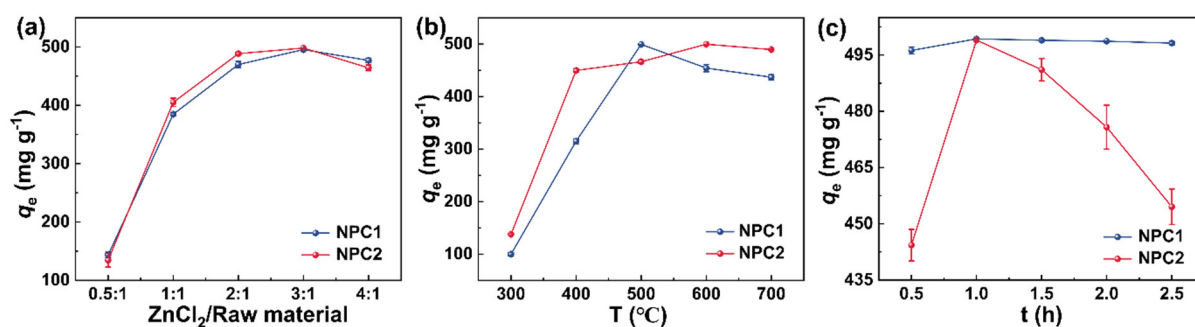

**Figure S1.** Effect of the preparation parameters of (a) MR (T: 500 °C, t: 1 h), (b) T (MR: 3:1, t: 1 h), (c) t (MR: 3:1, T: 500 °C (NPC1), 600 °C (NPC2)) of NPC1 and NPC2 towards MB adsorption ( $c_0$ : 500 mg L<sup>-1</sup>, pH=12, 1 h, 25 °C).

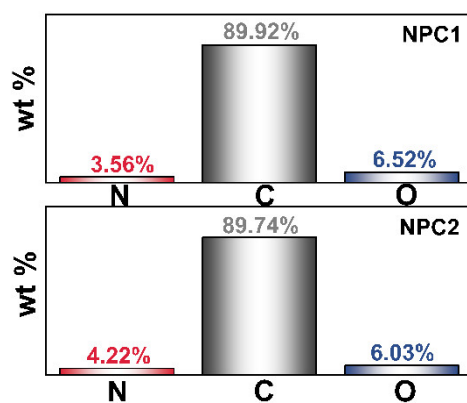

**Figure S2.** The relative elemental contents of NPC1 and NPC2 from XPS.

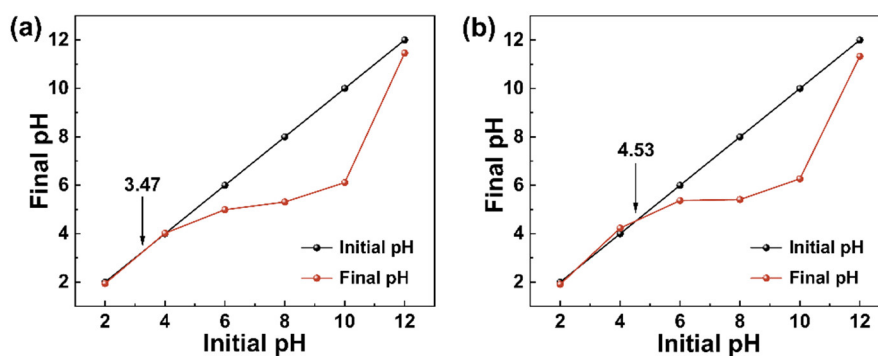

**Figure S3.** Zero charge point of of NPC1(a) and NPC2 (b).

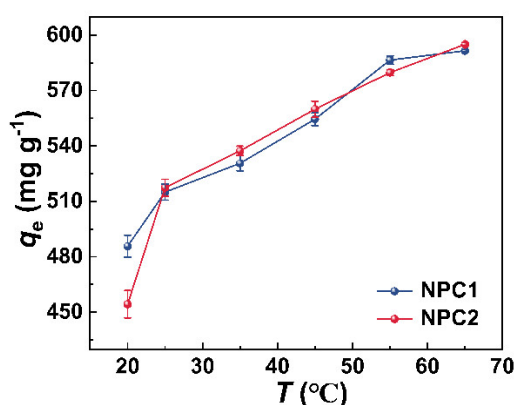

**Figure S4.** Changes in  $q_e$  of NPC1 and NPC2 for MB with  $T$  ( $c_0$ : 600 mg L<sup>-1</sup>, pH: 12, 1 h).

**Table S1.** Comparison of specific surface area and total pore volume of NPC1, NPC2 and other carbon materials.

| Carbon materials                                 | $S_{\text{BET}}$<br>(m <sup>2</sup> g <sup>-1</sup> ) | $V_{\text{T}}$<br>(m <sup>3</sup> g <sup>-1</sup> ) | References       |
|--------------------------------------------------|-------------------------------------------------------|-----------------------------------------------------|------------------|
| Groundnut shell activated carbon                 | 412                                                   | 0.322                                               | [1]              |
| Green solid waste N-self-doped porous carbon     | 632.76                                                | 0.35                                                | [2]              |
| Coconut shell magnetic activated carbon          | 747.71                                                | 0.42                                                | [3]              |
| Pomelo peel waste-derived porous carbon          | 939.4                                                 | 0.62                                                | [4]              |
| Pineapple peel activated carbon                  | 1160.07                                               | 0.544                                               | [5]              |
| Seaweed activated carbon                         | 1238.491                                              | /                                                   | [6]              |
| Industrial alkali lignin N-doped porous carbon   | 1309                                                  | 0.733                                               | [7]              |
| <i>Myristica fragrans</i> shell activated carbon | 1462                                                  | 0.873                                               | [8]              |
| <b>NPC1</b>                                      | <b>1492.9</b>                                         | <b>1.01</b>                                         | <b>This work</b> |
| <b>NPC2</b>                                      | <b>1712.7</b>                                         | <b>0.85</b>                                         | <b>This work</b> |

**Table S2.** Comparison of surface N content of obtained of NPC1, NPC2 and other N-self-doped carbon materials.

| N-self-doped carbon materials                                                        | N<br>(at. %) | References |
|--------------------------------------------------------------------------------------|--------------|------------|
| Lignin N, O-codoped porous carbon                                                    | 1.07         | [9]        |
| N/S self-doping hierarchical porous carbon                                           | 1.24         | [10]       |
| <i>Platanus acerifolia</i> (Aiton) Willd. fruit-derived nitrogen-doped porous carbon | 1.31         | [11]       |
| Garlic peels nitrogen self-doped porous carbon                                       | 1.77         | [12]       |
| Water hyacinth N-self-doped porous carbon                                            | 2.73         | [13]       |
| Honeycomb-like N/O self-doped hierarchical porous carbons derived from low-rank coal | 2.9          | [14]       |

|                                                               |             |                  |
|---------------------------------------------------------------|-------------|------------------|
| N-self-doped porous carbon derived from animal-heart          | 3.03        | [15]             |
| Poplar catkin N-doped hierarchical porous carbon              | 3.16        | [16]             |
| Semi-coking wastewater derived N–O–S self-doped porous carbon | 3.39        | [17]             |
| <b>NPC1</b>                                                   | <b>3.56</b> | <b>This work</b> |
| <b>NPC2</b>                                                   | <b>4.22</b> | <b>This work</b> |

**Table S3.** Comparison of  $q_m$  of NPC1, NPC2 and other waste-based carbon materials.

| Carbon materials                                                    | $q_m$<br>(mg g <sup>-1</sup> ) | References       |
|---------------------------------------------------------------------|--------------------------------|------------------|
| Eggshell membrane porous biochar adsorbent                          | 110.38                         | [18]             |
| Coconut shell magnetic activated carbon                             | 156.25                         | [3]              |
| Pineapple peel activated carbon                                     | 165.17                         | [5]              |
| Seaweed activated carbon                                            | 243.839                        | [6]              |
| <i>Myristica fragrans</i> shell activated carbon                    | 346.85                         | [8]              |
| Iron doped activated carbon derived from <i>Delonix regia</i> barks | 357.142                        | [19]             |
| Heavy bio-oil porous biochar                                        | 411                            | [20]             |
| Cyanobacteria-plastic composite carbon                              | 490                            | [21]             |
| <b>NPC1</b>                                                         | <b>568.18</b>                  | <b>This work</b> |
| <b>NPC2</b>                                                         | <b>581.40</b>                  | <b>This work</b> |

## References

- Mani, D.; Elango, D.; Priyadharsan, A.; Al-Humaid, L. A.; Al-Dahmash, N. D.; Ragupathy, S.; Jayanthi, P.; Ahn, Y. H. Groundnut shell chemically treated with KOH to prepare inexpensive activated carbon: Methylene blue adsorption and equilibrium isotherm studies. *Environ. Res.* **2023**, *231*(1), 116026.
- Hao, R. N.; Ma, R. N.; Cao, Y. L.; Zhou, W. Y.; Chai, H. Facile fabrication of N-self-doped porous carbons from green solid waste for supercapacitors with high cycling stability and flexibility. *Mater. Today Commun.* **2022**, *33*, 104911.
- Yağmur, H. K.; Kaya, İ. Synthesis and characterization of magnetic ZnCl<sub>2</sub>-activated carbon produced from coconut shell for the adsorption of methylene blue. *J. mol. Struct.* **2021**, *1232*, 130071.
- Zhang, W. L.; Liu, M. W.; Zhao, Y. H.; Liao, Q. H., Facile preparation of porous carbon derived from pomelo peel for efficient adsorption of methylene blue. *Molecules* **2022**, *27*(10), 3096.
- Rosli, N. A.; Ahmad, M. A.; Noh, T. U. Unleashing the potential of pineapple peel-based activated carbon: Response surface methodology optimization and regeneration for methylene blue and methyl red dyes adsorption. *Inorg. Chem. Commun.* **2023**, *155*, 111041.
- Jiang, D.; Li, H. P.; Cheng, X. X.; Ling, Q. F.; Chen, H.; Barati, B.; Yao, Q. F. Abomohra, A.; Hu, X.; Bartocci, P.; Wang, S. A mechanism study of methylene blue adsorption on seaweed biomass derived carbon: From macroscopic to microscopic scale. *Process Saf. Environ.* **2023**, *172*, 1132-1143.
- Zheng, L.; Wang, H. M.; Wang, X. H.; Kong, F. G.; Liu, Y.; Zhang, F. S. Fabrication of N-doped micro-mesoporous carbons from industrial alkali lignin with urea assistance for high-efficiency adsorption of methylene blue. *Ind. Crop. Prod.* **2023**, *203*, 117146.

8. Mariana, M.; Mistar, E. M.; Alfatah, T.; Supardan, M. D. High-porous activated carbon derived from *Myristica fragrans* shell using one-step KOH activation for methylene blue adsorption. *Bioresour. Technol. Rep.* **2021**, *16*, 100845.
9. Gong, L. Z.; Bao, A. G. L. High-value utilization of lignin to prepare N, O-codoped porous carbon as a high-performance adsorbent for carbon dioxide capture. *J. CO<sub>2</sub> Util.* **2023**, *68*, 102374.
10. Dong, K. M.; Liu, S.; Guo, F. Q.; Wang, J. J.; Tang, B.; Zhao, N. J.; Kong, L. W.; Zhang, Y. D. Facile synthesis of hierarchical porous carbon electrodes with 3D self-supporting structure and N/S self-doping for advanced energy storage device. *J. Energy Storage* **2023**, *72(A)*, 108218.
11. Li, Y.; Li, H. X.; Zhou, T. T.; Lai, Q.; Egabaierdi, G.; Chen, S. W.; Song, H. O.; Zhang, S. P.; Shi, C. F.; Yang, S. G.; He, H.; Zhang, X. Q. *Platanus acerifolia* (Aiton) Willd. fruit-derived nitrogen-doped porous carbon as an electrode material for the capacitive deionization of brackish water. *J. Environ. Chem. Eng.* **2023**, *11(3)*, 109914.
12. Liu, S.; Dong, K. M.; Guo, F. Q.; Qiao, Q. X.; Xu, L. Y.; Wang, J. J.; Kong, L. W.; Zhang, Y. D.; Chang, J. F.; Yan, W. J. Green synthesis of nitrogen self-doped porous carbons from waste garlic peels for high-performance supercapacitor applications. *J. Anal. Appl. Pyrol.* **2023**, *173*, 106063.
13. Zhang, X. k.; Ma, X. Q.; Yu, Z. S.; Yi, Y. J.; Lu, C. X.; Lu, X. L. Microwave-assisted two-step pyrolysis of water hyacinth for the preparation of N-self-doped porous carbon. *J. Anal. Appl. Pyrol.* **2023**, *173*, 106061.
14. Li, L.; Wei, X. Y.; Shao, C. W.; Yin, F.; Sun, B. K.; Liu, F. J.; Li, J. H.; Liu, Z. Q.; Zong, Z. M. Honeycomb-like N/O self-doped hierarchical porous carbons derived from low-rank coal and its derivatives for high-performance supercapacitor. *Fuel* **2023**, *331(1)*, 125658.
15. Yang, B. Y.; Gao, J. P.; Xie, M. H.; Zuo, S. S.; Kang, H.; Sun, Y.; Xu, X. Y.; Wang, W.; Gao, C. J.; Liu, Y.; Yan, J. N-self-doped porous carbon derived from animal-heart as an electrocatalyst for efficient reduction of oxygen. *J. Colloid Interf. Sci.* **2020**, *579(1)*, 832-841.
16. Chang, B. B.; Shi, W. W.; Yin, H.; Zhang, S. R. Poplar catkin-derived self-templated synthesis of N-doped hierarchical porous carbon microtubes for effective CO<sub>2</sub> capture. *Chem. Eng. J.* **2019**, *358*, 1507-1518.
17. Wang, X. J.; Wang, Y. F.; Yan, L.; Wang, Q.; Li, J.; Zhong, X.; Liu, Q. Q.; Li, Q. C.; Cui, S.; Xie, G. From pollutant to high-performance supercapacitor: Semi-coking wastewater derived N-O-S self-doped porous carbon. *Colloid. Surface. A* **2023**, *657(B)*, 130596.
18. Wu, T. T.; Yang, G. P.; Cao, J. X.; Xu, Z. W.; Jiang, X. H. Activation and adsorption mechanisms of methylene blue removal by porous biochar adsorbent derived from eggshell membrane. *Chem. Eng. Res. Des.* **2022**, *188*, 330-341.
19. Joshiba, G. J.; Kumar, P. S.; Rangasamy, G.; Nguenagni, P. T.; Pooja, G.; Balji, G. B.; Alagumalai, K.; El-Serehy, H. A. Iron doped activated carbon for effective removal of tartrazine and methylene blue dye from the aquatic systems: Kinetics, isotherms, thermodynamics and desorption studies. *Environ. Res.* **2022**, *215(3)*, 114317.
20. Zhang, H. Y.; Peng, B.; Liu, Q. Y.; Wu, C. S.; Li, Z. W. Preparation of porous biochar from heavy bio-oil for adsorption of methylene blue in wastewater. *Fuel Process. Technol.* **2022**, *238*, 107485.
21. Li, L. X.; Wang, J.; Jia, C.; Lv, Y.; Liu, Y. Co-pyrolysis of cyanobacteria and plastics to synthesize porous carbon and its application in methylene blue adsorption. *J. Water Process Eng.* **2020**, *39*, 101753.
